# Supplementary material
Source: PubMed Central journal article supplement (PMC5660643)
Supplement: NIHMS913285-supplement-1.pdf [file NIHMS913285-supplement-1.pdf]

1 **Biomechanical Regulation of Drug Sensitivity in an Engineered Model of Human Tumor**  
 2 A. Marturano-Kruik, A. Villasante, K. Yaeger, S. R. Ambati, A. Chramiec, M.T Raimondi, G.  
 3 Vunjak-Novakovic.

4  
 5 **Supplementary material**  
 6

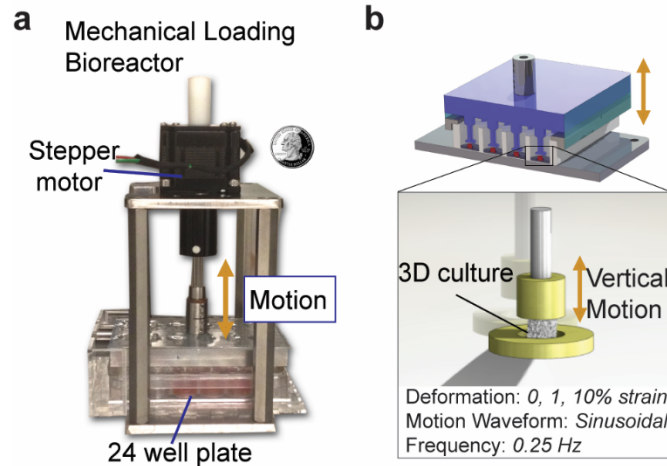

7  
 8 **Fig.S1. Mechanical loading bioreactor overview.** (a) Loading bioreactor designed to  
 9 accommodate a standard tissue culture plate housing 24 samples. The motion is generated by  
 10 a stepper motor and a linear actuator. (b) Experimental set-up and stimulation parameters.  
 11

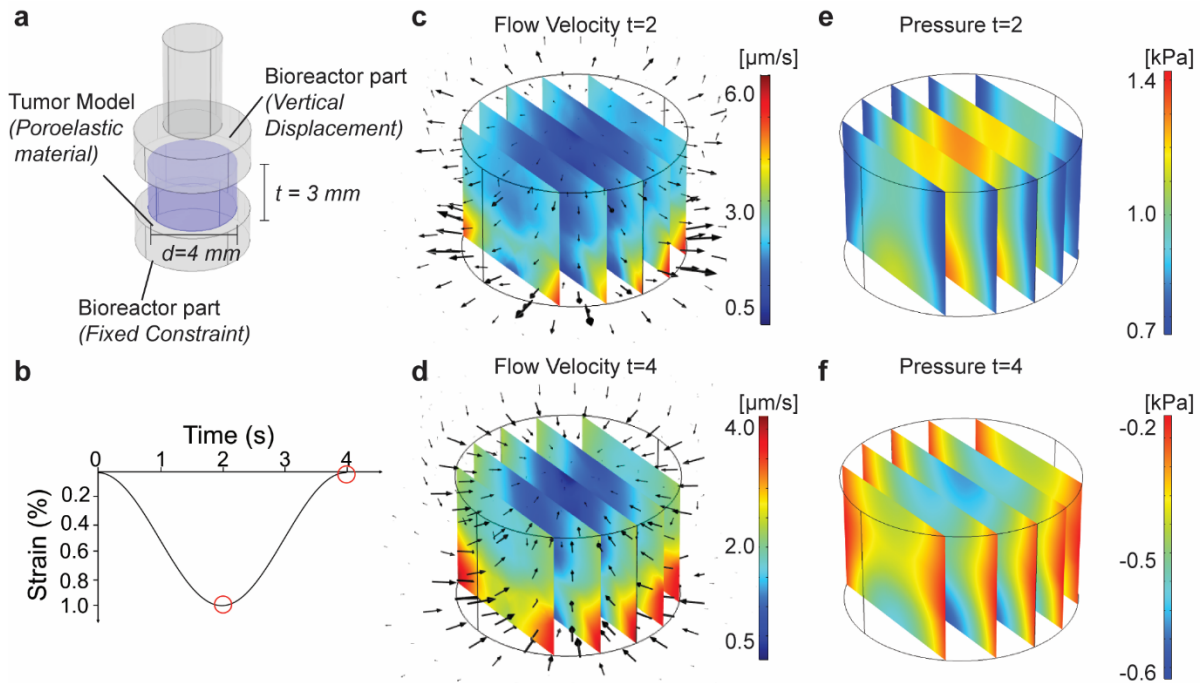

12 **Fig.S2 Computational estimation of load-generated flow velocities and pressure.** (a)  
 13 Experimental setup, geometry and boundary conditions of the computational study. (b)  
 14 Displacement waveform to generate 1% strain in the 3D model. (c,d) Flow velocities during  
 15 loading (t=2s) and unloading (t=4s). (e,f) Pressure during loading (t=2s) and unloading (t=4s).

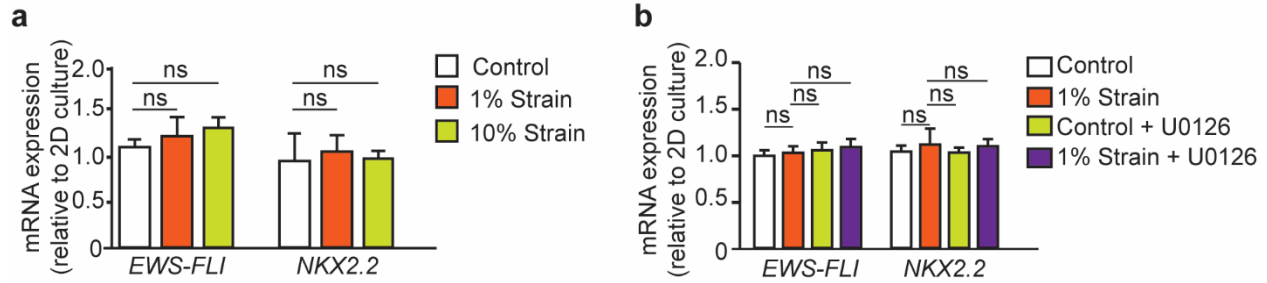

16 **Fig.S3. Ewing sarcoma oncogene expression following mechanical stimulation.** (a) qRT-  
 17 PCR analysis of the ES oncogene *EWS-FLI* and its target *NKX2.2* mRNA levels, when cells  
 18 were exposed to increased amplitudes of strain (1or 10%). (b) qRT-PCR analysis of the ES  
 19 oncogene *EWS-FLI* and its target *NKX2.2* mRNA levels, when cells were exposed to 1% strain  
 20 and cultured in the presence of the MEK1/2 inhibitor U0126 (10  $\mu$ M).

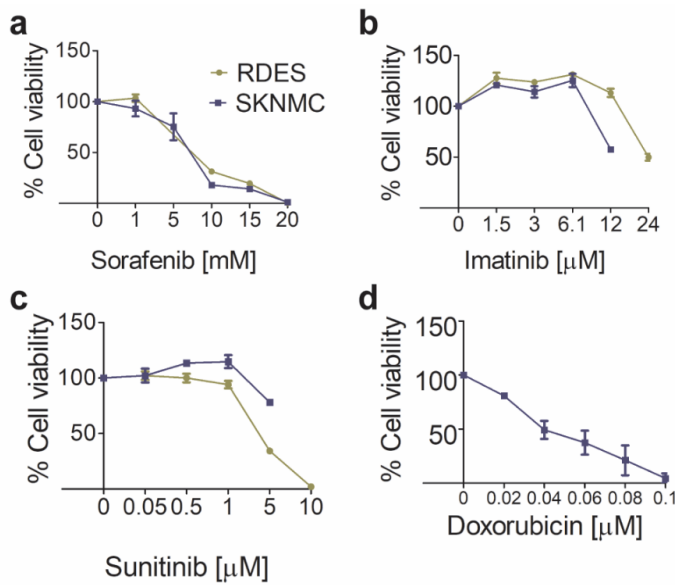

21 **Fig.S4 ES cells lines drug sensitivity in 2D culture.** ES cell lines SK-N-MC and RDES were  
 22 exposed to increasing concentrations of sorafenib, sunitinib, imatinib and doxorubicin for 48  
 23 hours. Cell viability (MTA assay) is expressed as percentage of non-treated cells.

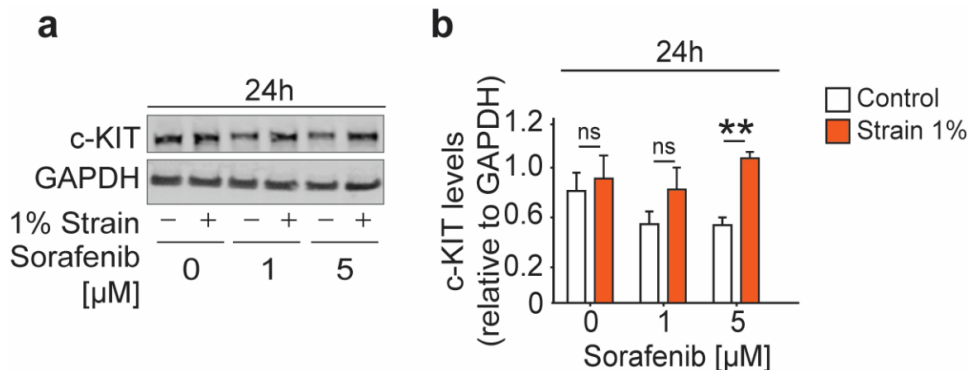

24 **Fig.S5 Mechanical stimulation modulates c-KIT expression.** (a) Western blot analysis  
 25 showing c-KIT protein levels in ES cells exposed to mechanical stimulation (+) or in the controls  
 26 (-), treated with sorafenib for 24 hours. (b) Quantified c-KIT protein levels represented as  
 27 relative changes in band density normalized to GAPDH. Data is represented as average  $\pm$  SD  
 28 (n= 3; \* p<0.05; \*\* p<0.01 line indicates statistical comparison between groups). P values are  
 29 determined by Student's t-test (two-tailed).

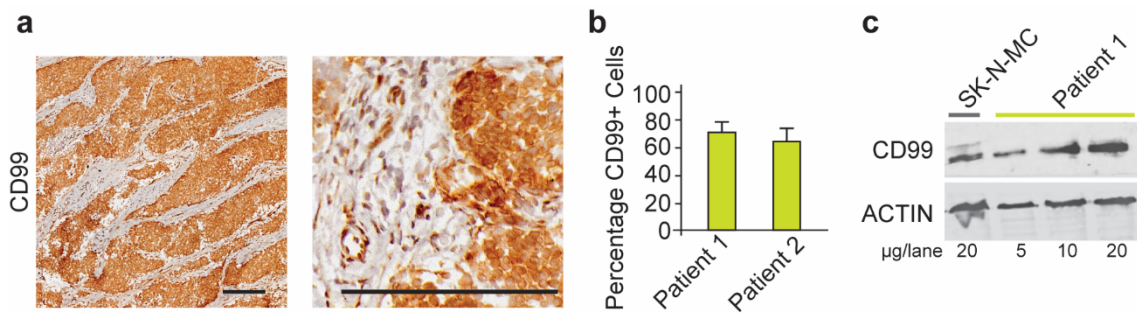

30  
 31 **Fig. S6 Analysis of tumor versus stromal fraction in ES tumor samples.**  
 32 **(a)** Histological analysis showing the expression of the diagnostic marker CD99 used to assess  
 33 the presence of tumor cells with respect to stromal cells. Scale bars: 500 µm. **(b)** Quantification  
 34 of CD99 positive fraction expressed as percentage area (n=3). **(c)** Western blot analysis  
 35 showing CD99 protein levels in ES cell lines cultured in 2D compared to the levels in tumors.  
 36 Protein extracted from ES tumors was loaded with increasing amounts (5, 10, 20 µg/lane), while  
 37 ES cell lines protein was kept constant (20 µg/lane).  
 38

| IC50 (µM)   | Cell lines |       | PDX  |
|-------------|------------|-------|------|
|             | SK-N-MC    | RD-ES | PS3  |
| Sorafenib   | 6.5        | 7     | 22   |
| Sunitinib   | 7          | 5     | 15   |
| Imatinib    | 12         | 24    | 25   |
| Doxorubicin | 0.03       | n/c   | 0.05 |

39  
 40 **Table S1. IC50 values in 2D culture.**

| Sorafenib [µM] | Viable cells (%) |             |            |
|----------------|------------------|-------------|------------|
|                | Strain           | Control     | 2D culture |
| 1              | 153.0 ± 9.0      | 107.9 ± 7.1 | 74.5 ± 2.5 |
| 5              | 116.8 ± 3.1      | 66.9 ± 3.8  | 54.6 ± 3.8 |
| 10             | 46.8 ± 2.0       | 37.2 ± 3.2  | 18.7 ± 4.5 |
| 15             | 2.6 ± 1.9        | 4.2 ± 3.0   | 9.8 ± 1.6  |
| 20             | 7.4 ± 2.0        | 1.8 ± 1.4   | 4.3 ± 0.3  |
| IC50 [µM]      | 10               | 7.8         | 5          |

43  
 44  
 45 **Table S2. ES cells drug sensitivity after 3D model dissociation**

46

| Gene                                                  | PrimerBank ID |
|-------------------------------------------------------|---------------|
| EWS-FLI1 fusion isoform type 8 (EWS-FLI)              | 633772a1      |
| NK2 homeobox 2 (NKX2-2)                               | 32307133b1    |
| Secreted phosphoprotein 1 (SPP1) ALIAS: OPN           | 38146097b1    |
| Integrin-binding sialoprotein (IBSP) ALIAS: BSP       | 167466186b1   |
| Matrix metalloproteinase 3 (MMP3)                     | 73808272b2    |
| Matrix metalloproteinase 9 (MMP9)                     | 74272286b1    |
| Glyceraldehyde-3-phosphate dehydrogenase (GAPDH)      | 83641890b1    |
| Parathyroid hormone-like hormone (PTHrP) ALIAS: PTHrP | 39995087c1    |
| Runt-related transcription factor 2 (RUNX2)           | 225690525c1   |

47

48

49

**Table S3. List of primers**

| Description                         | Symbol     | Value                                                              | reference  |
|-------------------------------------|------------|--------------------------------------------------------------------|------------|
| Scaffold thickness [mm]             | t          | 3                                                                  | This study |
| Scaffold diameter [mm]              | h          | 4                                                                  | This study |
| Porosity [%]                        | $\epsilon$ | 0.85                                                               | (46)       |
| Young's Modulus [kPa]               | E          | 3                                                                  | This study |
| Poisson's ratio                     | $\nu$      | 0.2                                                                | This study |
| Permeability [m <sup>2</sup> ]      | k          | $0.6 \cdot 10^{-14}$                                               | (48)       |
| Biot-Willis coefficient             | $\alpha_b$ | 0.95                                                               | (49)       |
| Density [kg/m <sup>3</sup> ]        | $\rho$     | 157                                                                | (48)       |
| Dynamic viscosity medium [Pa s]     | $\mu$      | $8.1 \cdot 10^4$                                                   | (50)       |
| Density medium [kg/m <sup>3</sup> ] | $\rho_f$   | 1000                                                               | (50)       |
| Displacement Function [m]           | w          | $(15 \cdot 10^{-6}) \cdot \cos(1.57 \cdot t) - (15 \cdot 10^{-6})$ | This study |

50

**Table S4. Computational parameters**

52

53

**Video S1. Bioreactor overview****Video S2. Computational estimation of pressure and flow velocity**

56
